# Supplementary material for: Reduced graphene oxide uniformly decorated with Co nanoparticles: facile synthesis, magnetic and catalytic properties
Source: Royal Society of Chemistry journal article supplement (doi:10.1039/c6ra21515g), 2016-01-01
Supplement: c6ra21515g1.pdf [file c6ra21515g1.pdf]

Electronic Supplementary Information (ESI) for

**Reduced graphene oxide uniformly decorated with Co  
Nanoparticles: Facile synthesis, magnetic and catalytic  
properties**

Zhenyuan Ji,<sup>a</sup> Yuqin Wang,<sup>a</sup> Juan Yang,<sup>a</sup> Xiaoping Shen,<sup>a\*</sup> Qiang Yu,<sup>a</sup> Lirong Kong<sup>a</sup>  
and Hu Zhou<sup>b</sup>

<sup>a</sup> *School of Chemistry and Chemical Engineering, School of Environment and Safety  
Engineering, Jiangsu University, Zhenjiang 212013, P. R. China*

<sup>b</sup> *School of Material Science and Engineering, Jiangsu University of Science and  
Technology, Zhenjiang 212003, P. R. China*

\*Corresponding author. E-mail: xiaopingshen@163.com

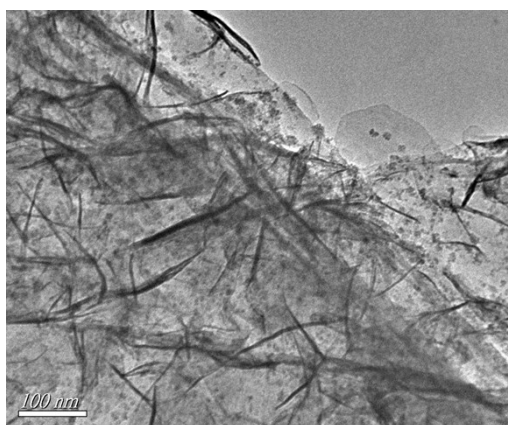

**Fig. S1.** TEM image of the RGO/Co-0.25 nanocomposites.

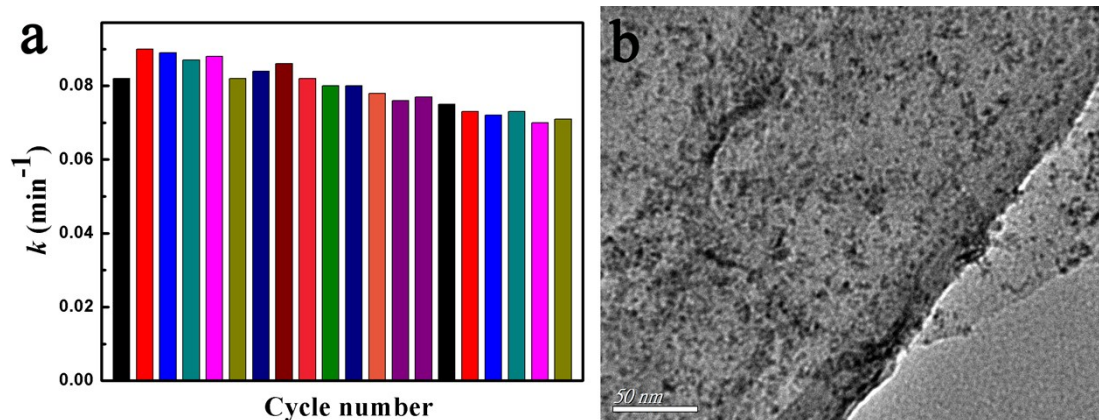

**Fig. S2.** (a) The stability of RGO/Co-0.2 nanocomposites by performing the same reduction reaction with 20 cycles; (b) Typical TEM image of RGO/Co-0.2 nanocomposites after 20 catalytic cycles.
